# Supplementary material for: Recombination between the Fostera MLV-like Strain and the Strain Belonging to Lineage 1 of Porcine Reproductive and Respiratory Syndrome Virus in Korea
Source: MDPI journal article supplement (doi:10.3390/v14061153), 2022-05-26
Supplement: s1 [file s1]

**Table S1.** Identities of complete genomic sequence of 20D160-1 and 21R2-63-1 isolates to other PRRSV reference strains.

| Pairwise % Identity to 20D160-1 (nt) |           |       |       |           |       |        |           |        |               |       |          |
|--------------------------------------|-----------|-------|-------|-----------|-------|--------|-----------|--------|---------------|-------|----------|
|                                      | VR2332    | LMY   | P129  | TJ        | CG    | SDSU73 | NADC30    | NADC31 | JB15-N-P31-GB | CA-2  | KNU-1902 |
|                                      | Lineage 5 |       |       | Lineage 8 |       |        | Lineage 1 |        |               | Kor C |          |
| ORF1a                                | 87.97     | 85.39 | 98.94 | 89.32     | 88.91 | 93.02  | 79.51     | 77.55  | 77.44         | 77.96 | 75.82    |
| ORF1b                                | 92.25     | 90.42 | 99.33 | 92.70     | 92.44 | 94.72  | 87.92     | 85.83  | 85.79         | 87.22 | 86.55    |
| ORF2                                 | 85.58     | 87.68 | 88.44 | 85.57     | 85.41 | 85.98  | 82.00     | 83.41  | 81.62         | 84.63 | 95.15    |
| ORF3                                 | 82.97     | 81.10 | 82.72 | 80.62     | 80.62 | 81.91  | 77.60     | 78.13  | 75.16         | 88.54 | 96.64    |
| ORF4                                 | 85.29     | 85.78 | 88.06 | 87.17     | 86.71 | 86.26  | 85.26     | 81.91  | 83.05         | 93.54 | 96.75    |
| ORF5                                 | 89.79     | 86.66 | 97.97 | 92.37     | 92.18 | 93.32  | 84.24     | 84.24  | 83.79         | 83.17 | 77.50    |
| ORF6                                 | 96.27     | 94.23 | 99.62 | 97.66     | 97.66 | 99.23  | 87.98     | 92.46  | 88.64         | 92.24 | 89.36    |
| ORF7                                 | 93.44     | 91.28 | 99.46 | 94.94     | 94.94 | 94.35  | 91.26     | 88.71  | 89.04         | 92.25 | 88.70    |

  

| Pairwise % Identity to 21R2-63-1 (nt) |           |       |       |           |       |        |           |        |               |       |          |
|---------------------------------------|-----------|-------|-------|-----------|-------|--------|-----------|--------|---------------|-------|----------|
|                                       | VR2332    | LMY   | P129  | TJ        | CG    | SDSU73 | NADC30    | NADC31 | JB15-N-P31-GB | CA-2  | KNU-1902 |
|                                       | Lineage 5 |       |       | Lineage 8 |       |        | Lineage 1 |        |               | Kor C |          |
| ORF1a                                 | 76.27     | 74.64 | 75.03 | 72.86     | 73.19 | 74.71  | 90.00     | 78.82  | 92.32         | 75.66 | 73.29    |
| ORF1b                                 | 85.73     | 83.71 | 88.59 | 85.85     | 85.62 | 87.57  | 91.55     | 85.64  | 92.07         | 83.30 | 82.35    |
| ORF2                                  | 84.71     | 83.86 | 85.14 | 83.09     | 82.25 | 84.04  | 93.56     | 83.20  | 96.39         | 81.30 | 81.70    |
| ORF3                                  | 80.07     | 80.50 | 79.87 | 79.30     | 78.61 | 80.29  | 93.10     | 81.68  | 95.11         | 78.86 | 76.56    |
| ORF4                                  | 82.87     | 84.39 | 83.47 | 81.49     | 81.00 | 84.17  | 93.74     | 87.66  | 94.97         | 83.44 | 82.96    |
| ORF5                                  | 80.32     | 79.39 | 81.46 | 80.01     | 80.33 | 80.86  | 90.84     | 90.84  | 92.39         | 81.98 | 83.10    |
| ORF6                                  | 89.76     | 90.20 | 89.08 | 89.33     | 89.78 | 88.88  | 95.65     | 90.30  | 96.46         | 87.36 | 87.60    |
| ORF7                                  | 89.76     | 88.39 | 89.03 | 88.38     | 89.03 | 88.39  | 94.96     | 88.03  | 96.69         | 90.05 | 85.24    |

**Table S2.** Recombination breakpoints of 20D160-1 and 21R2-63-1 with associated parental strains detected by RDP4 software.

| Isolates  | Method   | Breakpoint Position (nt) * |        | Major Parent | Minor Parent | p-Value                  |
|-----------|----------|----------------------------|--------|--------------|--------------|--------------------------|
|           |          | Beginning                  | Ending |              |              |                          |
| 20D160-1  | RDP      | 11,990                     | 13,563 | P129         | KNU-1902     | $2.806 \times 10^{-88}$  |
|           | GENECONV |                            |        |              |              | $9.770 \times 10^{-93}$  |
|           | BootScan |                            |        |              |              | $2.169 \times 10^{-136}$ |
|           | MaxChi   |                            |        |              |              | $7.207 \times 10^{-32}$  |
|           | Chimaera |                            |        |              |              | $2.351 \times 10^{-31}$  |
|           | SiScan   |                            |        |              |              | $5.933 \times 10^{-28}$  |
|           | 3Seq     |                            |        |              |              | $6.661 \times 10^{-15}$  |
| 21R2-63-1 | RDP      | 7,654                      | 8,599  | NADC30       | P129         | $6.080 \times 10^{-29}$  |
|           | GENECONV |                            |        |              |              | $7.742 \times 10^{-51}$  |
|           | BootScan |                            |        |              |              | $2.051 \times 10^{-63}$  |
|           | MaxChi   |                            |        |              |              | $4.893 \times 10^{-18}$  |
|           | Chimaera |                            |        |              |              | $2.792 \times 10^{-19}$  |
|           | SiScan   |                            |        |              |              | $1.321 \times 10^{-20}$  |
|           | 3Seq     |                            |        |              |              | $2.220 \times 10^{-15}$  |

\* Nucleotide (nt) position based on VR2332 strain.
